# Supplementary material
Source: PubMed Central journal article supplement (PMC6269318)
Supplement: 2018_205575-Disclosures_and_Contributions.pdf [file 2018_205575-Disclosures_and_Contributions.pdf]

Haematologica  
HAEMATOL/2018/205575  
Version 1  
Assessment of iron deficiency

Chaim Hershko

Disclosures: Nothing to disclose.
